# Supplementary material for: Identification of Differentially Expressed circRNAs, miRNAs, and Genes in Patients Associated with Cartilaginous Endplate Degeneration
Source: Hindawi journal article supplement (doi:10.1155/2021/2545459), 2021-01-01
Supplement: f2 [file 2545459.f2.pdf]

| DECs                | logFC     | P. Value |
|---------------------|-----------|----------|
| hsa_circ_(3.0112461 | 0.0021577 |          |
| hsa_circ_(2.9322695 | 0.0101198 |          |
| hsa_circ_(2.9320618 | 0.0014888 |          |
| hsa_circ_(2.8542286 | 0.0037945 |          |
| hsa_circ_(2.8421766 | 0.0110668 |          |
| hsa_circ_(2.8323702 | 0.0074383 |          |
| hsa_circ_(2.7626934 | 0.0245654 |          |
| hsa_circ_(2.7375548 | 0.000301  |          |
| hsa_circ_(2.546448  | 0.0141502 |          |
| hsa_circ_(2.5247796 | 0.0074788 |          |
| hsa_circ_(2.5019093 | 0.0196445 |          |
| hsa_circ_(2.4988487 | 0.0093718 |          |
| hsa_circ_(2.4929199 | 0.0021279 |          |
| hsa_circ_(2.4772553 | 0.0017355 |          |
| hsa_circ_(2.455193  | 0.0228561 |          |
| hsa_circ_(2.448742  | 0.0085814 |          |
| hsa_circ_(2.4441484 | 0.0223211 |          |
| hsa_circ_(2.4319246 | 0.0184036 |          |
| hsa_circ_(2.4238805 | 0.0070902 |          |
| hsa_circ_(2.3750901 | 0.0101019 |          |
| hsa_circ_(2.3310092 | 0.000592  |          |
| hsa_circ_(2.319166  | 0.0110524 |          |
| hsa_circ_(2.2997468 | 8.10E-05  |          |
| hsa_circ_(2.299345  | 0.0277691 |          |
| hsa_circ_(2.2847809 | 0.0031945 |          |
| hsa_circ_(2.2810977 | 0.0047685 |          |
| hsa_circ_(2.2793838 | 0.0126079 |          |
| hsa_circ_(2.2515075 | 0.0061124 |          |
| hsa_circ_(2.2430183 | 0.0001503 |          |
| hsa_circ_(2.2319103 | 0.0008881 |          |
| hsa_circ_(2.2172669 | 0.0020797 |          |
| hsa_circ_(2.213023  | 0.001087  |          |
| hsa_circ_(2.2080801 | 0.0025483 |          |
| hsa_circ_(2.2062012 | 0.0005576 |          |
| hsa_circ_(2.1870533 | 0.000507  |          |
| hsa_circ_(2.1826204 | 0.0014904 |          |
| hsa_circ_(2.1804249 | 0.0012267 |          |
| hsa_circ_(2.1746017 | 0.0013841 |          |
| hsa_circ_(2.1733995 | 0.011816  |          |
| hsa_circ_(2.1708167 | 8.79E-06  |          |
| hsa_circ_(2.1707345 | 0.0028434 |          |
| hsa_circ_(2.1575691 | 0.0008484 |          |
| hsa_circ_(2.1554639 | 0.00067   |          |
| hsa_circ_(2.1502075 | 0.0085231 |          |
| hsa_circ_(2.1462412 | 0.0280209 |          |
| hsa_circ_(2.1413955 | 0.0018356 |          |

hsa\_circ\_(2.1286627 0.0049049  
hsa\_circ\_(2.1155902 0.0019104  
hsa\_circ\_( 2.103539 0.0022765  
hsa\_circ\_(2.1030627 0.014608  
hsa\_circ\_(2.0972165 3.13E-05  
hsa\_circ\_(2.0970978 0.0018759  
hsa\_circ\_(2.0940368 0.0152268  
hsa\_circ\_(2.0893204 0.0005467  
hsa\_circ\_(2.0773955 0.0134596  
hsa\_circ\_(2.0755325 0.0145145  
hsa\_circ\_(2.0505072 0.0222559  
hsa\_circ\_(2.0471347 0.0004748  
hsa\_circ\_(2.0450496 0.0047372  
hsa\_circ\_(2.0386032 0.0001816  
hsa\_circ\_(2.0356841 0.0075042  
hsa\_circ\_(2.0342428 4.77E-05  
hsa\_circ\_(2.0334149 0.0048146  
hsa\_circ\_(2.0306033 0.0001274  
hsa\_circ\_(2.0176071 0.0017403  
hsa\_circ\_(2.0158912 2.09E-05  
hsa\_circ\_(2.0156479 0.0102074  
hsa\_circ\_( 2.014496 0.0048171  
hsa\_circ\_(2.0144585 0.0281394  
hsa\_circ\_(2.0052793 0.0092471  
hsa\_circ\_(2.0046892 0.0310569  
hsa\_circ\_(2.0031781 0.0147515  
hsa\_circ\_( 2.002746 0.0078287  
hsa\_circ\_(2.0017462 0.0002749

| DECs             | logFC        | P. Value    |
|------------------|--------------|-------------|
| hsa_circ_0041063 | -2.009610088 | 0.026183322 |
| hsa_circ_0042061 | -2.009899346 | 0.041814142 |
| hsa_circ_0000262 | -2.018145062 | 0.03644676  |
| hsa_circ_0043606 | -2.031428266 | 0.007523991 |
| hsa_circ_0075839 | -2.041175749 | 0.017654683 |
| hsa_circ_0002456 | -2.048504304 | 0.024889475 |
| hsa_circ_0062226 | -2.051943269 | 0.000422273 |
| hsa_circ_0045418 | -2.067212833 | 0.042569011 |
| hsa_circ_0015383 | -2.068338215 | 0.00109176  |
| hsa_circ_0027510 | -2.142966457 | 0.004221048 |
| hsa_circ_0025135 | -2.194550795 | 0.027919643 |
| hsa_circ_0070174 | -2.197022941 | 0.005210178 |
| hsa_circ_0088733 | -2.22344215  | 0.001089906 |
| hsa_circ_0082796 | -2.223727234 | 0.001430998 |
| hsa_circ_0027511 | -2.225560312 | 0.005470893 |
| hsa_circ_0036498 | -2.237857421 | 2.06E-05    |
| hsa_circ_0029409 | -2.249404787 | 0.00508612  |
| hsa_circ_0073629 | -2.279568152 | 0.002172502 |
| hsa_circ_0091734 | -2.295357301 | 0.005465298 |
| hsa_circ_0022340 | -2.309431758 | 0.009722134 |
| hsa_circ_0079215 | -2.321434544 | 0.00434551  |
| hsa_circ_0088731 | -2.33075338  | 0.000264584 |
| hsa_circ_0090316 | -2.333303782 | 0.047739853 |
| hsa_circ_0020467 | -2.342703781 | 0.029167287 |
| hsa_circ_0090317 | -2.362144119 | 0.006178614 |
| hsa_circ_0090318 | -2.365552297 | 0.020757404 |
| hsa_circ_0014221 | -2.366231272 | 0.010590796 |
| hsa_circ_0045516 | -2.368965531 | 0.024926804 |
| hsa_circ_0031282 | -2.391092034 | 0.003824483 |
| hsa_circ_0050872 | -2.394405235 | 0.039154551 |
| hsa_circ_0014220 | -2.485020545 | 0.004613074 |
| hsa_circ_0014222 | -2.54512011  | 0.003511746 |
| hsa_circ_0090314 | -2.54899377  | 0.018523654 |
| hsa_circ_0070186 | -2.586228303 | 0.000352518 |
| hsa_circ_0090320 | -2.595100007 | 0.011224203 |
| hsa_circ_0015856 | -2.597219563 | 0.017856892 |
| hsa_circ_0022102 | -2.623067448 | 0.003035594 |
| hsa_circ_0090319 | -2.685889987 | 0.009722743 |
| hsa_circ_0069094 | -2.686205595 | 0.011184252 |
| hsa_circ_0070187 | -2.695466675 | 0.000129729 |
| hsa_circ_0081375 | -2.759582184 | 0.019420585 |
| hsa_circ_0090321 | -2.816309376 | 0.019227685 |
| hsa_circ_0088732 | -2.845468917 | 0.000491314 |
| hsa_circ_0003808 | -2.917301681 | 0.015736114 |
| hsa_circ_0090315 | -3.1899664   | 0.027983329 |
| hsa_circ_0075949 | -3.233479938 | 9.82E-05    |

|                  |              |             |
|------------------|--------------|-------------|
| hsa_circ_0000577 | -3.272610034 | 0.000272688 |
| hsa_circ_0000576 | -3.318806673 | 0.000258288 |
| hsa_circ_0029995 | -3.379995366 | 0.033594444 |
| hsa_circ_0024595 | -3.450884239 | 0.036652717 |
| hsa_circ_0074821 | 2.09721653   | 3.13E-05    |
| hsa_circ_0074776 | 2.097097778  | 0.001875902 |
| hsa_circ_0000082 | 2.09403682   | 0.015226776 |
| hsa_circ_0032363 | 2.08932038   | 0.000546708 |
| hsa_circ_0028195 | 2.077395505  | 0.013459638 |
| hsa_circ_0001234 | 2.075532501  | 0.014514461 |
| hsa_circ_0077670 | 2.050507206  | 0.022255947 |
| hsa_circ_0027700 | 2.0471347    | 0.000474772 |
| hsa_circ_0074771 | 2.045049613  | 0.004737184 |
| hsa_circ_0010407 | 2.038603187  | 0.000181643 |
| hsa_circ_0020206 | 2.035684125  | 0.007504163 |
| hsa_circ_0031927 | 2.03424282   | 4.77E-05    |
| hsa_circ_0073242 | 2.033414935  | 0.004814588 |
| hsa_circ_0002329 | 2.030603272  | 0.00012738  |
| hsa_circ_0042445 | 2.017607126  | 0.001740307 |
| hsa_circ_0089445 | 2.015891191  | 2.09E-05    |
| hsa_circ_0089269 | 2.015647875  | 0.010207353 |
| hsa_circ_0015069 | 2.014495994  | 0.004817069 |
| hsa_circ_0060167 | 2.014458489  | 0.028139362 |
| hsa_circ_0052834 | 2.005279253  | 0.009247055 |
| hsa_circ_0001708 | 2.004689196  | 0.031056879 |
| hsa_circ_0020788 | 2.003178133  | 0.014751473 |
| hsa_circ_0066668 | 2.002745991  | 0.007828726 |
| hsa_circ_0076614 | 2.001746241  | 0.000274906 |

| MiRNAs   | logFC     | P. Value    |
|----------|-----------|-------------|
| MIR1202  | 1.0358214 | 0.007767091 |
| MIR4253  | 1.0457501 | 0.000784534 |
| MIR3194  | 1.0517678 | 0.013763622 |
| MIR548I2 | 1.0643297 | 0.015275434 |
| MIR5004  | 1.0736202 | 0.007977429 |
| MIR4515  | 1.1269813 | 0.048599927 |
| MIR6773  | 1.1755099 | 0.006942459 |
| MIR8058  | 1.2017716 | 0.011300163 |
| MIR4753  | 1.3066851 | 0.040283037 |
| MIR1272  | 1.3439073 | 0.011599463 |
| MIR3909  | 1.3972507 | 0.018754519 |
| MIR7157  | 1.438892  | 0.001891271 |
| MIR5093  | 1.5771862 | 0.000747085 |
| MIR5739  | 1.7334128 | 0.045655587 |
| MIR6843  | 1.7978172 | 0.048917716 |
| MIR675   | 1.8371084 | 0.01718786  |
| MIR1245A | 2.0820138 | 0.000488588 |





















































































































[illegible]

[illegible]

| MiRNAs   | logFC     | P. Value  |
|----------|-----------|-----------|
| MIR3660  | -1.833726 | 0.0419792 |
| MIR4740  | -1.673483 | 0.0349963 |
| MIR492   | -1.611437 | 0.0094709 |
| MIR4659B | -1.51848  | 0.0481186 |
| MIR4524B | -1.441064 | 0.0274178 |
| MIR3615  | -1.322923 | 0.0148092 |
| MIR4692  | -1.304571 | 0.0114549 |
| MIR4304  | -1.193742 | 0.0409451 |
| MIR4759  | -1.165829 | 0.0147415 |
| MIR6082  | -1.150018 | 0.0089029 |
| MIR19B1  | -1.135637 | 0.0074442 |
| MIR10B   | -1.134829 | 0.0010732 |
| MIR431   | -1.111581 | 0.0111784 |
| MIR4460  | -1.042149 | 0.0249697 |
| MIR223   | -1.036135 | 0.0205919 |
| MIR107   | -1.030152 | 0.0114288 |

| DEGs      | logFC    | P. Value |
|-----------|----------|----------|
| GALR1     | 2.007129 | 0.034731 |
| AFF3      | 2.012458 | 0.014644 |
| CRIP1     | 2.020168 | 0.01267  |
| FNDC1     | 2.036316 | 0.003412 |
| FGF18     | 2.06868  | 0.002242 |
| C10orf105 | 2.069054 | 0.006848 |
| TSPAN2    | 2.069507 | 0.018502 |
| RASL12    | 2.085478 | 0.009394 |
| CTHRC1    | 2.102234 | 0.000249 |
| SCX       | 2.114418 | 0.03076  |
| TNFAIP6   | 2.116339 | 0.033909 |
| C4B_2     | 2.127701 | 0.005131 |
| GSC       | 2.143845 | 0.000875 |
| ZIC5      | 2.154683 | 0.000411 |
| C4A       | 2.157368 | 0.003243 |
| PIEZ02    | 2.160463 | 0.003038 |
| ISM2      | 2.165033 | 0.001524 |
| CPLX1     | 2.167074 | 0.000975 |
| CLEC18A   | 2.186898 | 0.040414 |
| SOX11     | 2.207394 | 0.013614 |
| CALHM3    | 2.210152 | 0.000284 |
| FHOD3     | 2.21079  | 0.0161   |
| LRRC4B    | 2.212143 | 0.01639  |
| C4B       | 2.227066 | 0.003861 |
| FAP       | 2.228486 | 0.000193 |
| CDHR4     | 2.229039 | 0.000625 |
| PLEKHS1   | 2.231771 | 4.16E-05 |
| BTBD16    | 2.238766 | 0.000113 |
| RPA1      | 2.250446 | 0.000183 |
| KITLG     | 2.267965 | 0.000597 |
| GABRD     | 2.268903 | 0.009051 |
| RIMS2     | 2.278716 | 0.036681 |
| COL13A1   | 2.316527 | 0.021392 |
| NOV       | 2.337401 | 0.012824 |
| IMPG2     | 2.343098 | 0.009534 |
| ADAMTS14  | 2.355761 | 0.010495 |
| SVOP      | 2.411987 | 0.002175 |
| C4BPA     | 2.414203 | 0.000134 |
| HOXD3     | 2.421662 | 0.006477 |
| IFITM5    | 2.424692 | 0.002727 |
| ILDR2     | 2.435513 | 4.17E-05 |
| ROR1      | 2.448575 | 0.008233 |
| CHST13    | 2.451595 | 0.023224 |
| LMO1      | 2.463083 | 0.001654 |
| FAT3      | 2.467073 | 0.016515 |
| SDC1      | 2.46912  | 0.008198 |

|         |          |          |
|---------|----------|----------|
| OLFML2B | 2.486981 | 0.000423 |
| DMP1    | 2.489372 | 0.012151 |
| C8B     | 2.514905 | 0.032105 |
| CBLN4   | 2.543834 | 0.003415 |
| ISM1    | 2.566189 | 0.000593 |
| MEOX1   | 2.62779  | 0.002354 |
| GALNT16 | 2.679188 | 0.023162 |
| GSG1L   | 2.697212 | 0.020894 |
| PRSS35  | 2.831378 | 0.018665 |
| GDF5    | 2.849716 | 0.002605 |
| ADCY1   | 2.894792 | 0.008137 |
| SAMD11  | 2.895394 | 0.048933 |
| GPR20   | 2.961529 | 0.011052 |
| TNFSF15 | 2.988296 | 0.020796 |
| BIRC7   | 3.042691 | 0.005898 |
| ASPN    | 3.043034 | 0.020632 |
| PLA2G2A | 3.154312 | 0.00312  |
| GINS3   | 3.287875 | 0.002578 |
| AMTN    | 3.41208  | 0.013722 |
| LY6D    | 3.428054 | 0.027119 |
| MXRA5   | 3.545868 | 0.014173 |
| R3HDML  | 4.090977 | 0.006698 |

| DEGs    | logFC    | P. Value |
|---------|----------|----------|
| SCGB2A2 | -6.03984 | 0.00012  |
| SCGB1D2 | -5.12768 | 0.035869 |
| SCGB2A1 | -4.34501 | 0.011335 |
| DEFA4   | -4.32121 | 0.004203 |
| DEFA3   | -4.31009 | 0.010157 |
| SAA1    | -4.21457 | 0.049247 |
| RNASE3  | -4.0262  | 8.42E-05 |
| DEFA1   | -4.01091 | 0.014403 |
| SYT7    | -3.99833 | 0.000289 |
| HBD     | -3.93811 | 0.001656 |
| KLK11   | -3.78016 | 0.000287 |
| PRB2    | -3.67285 | 0.018113 |
| MMP8    | -3.42569 | 3.64E-05 |
| RNASE2  | -3.36963 | 0.000241 |
| CEACAM8 | -3.36409 | 0.000517 |
| PRB1    | -3.32555 | 0.025576 |
| MCEMP1  | -3.28913 | 0.009689 |
| S100A8  | -3.17636 | 0.002611 |
| MAOA    | -3.09686 | 0.015942 |
| CLC     | -3.04814 | 0.004771 |
| APOD    | -2.9727  | 0.023012 |
| HP      | -2.94126 | 0.000603 |
| CAMP    | -2.92904 | 0.043596 |
| PRH2    | -2.91582 | 0.004736 |
| CEBPE   | -2.88063 | 8.57E-05 |
| CCNA1   | -2.86983 | 0.001031 |
| CA1     | -2.86764 | 0.002624 |
| LTF     | -2.83654 | 0.00541  |
| ALOX5AP | -2.83055 | 0.034745 |
| MS4A3   | -2.82284 | 0.003918 |
| S100P   | -2.80534 | 0.012532 |
| ABCA9   | -2.8043  | 0.020043 |
| S100A9  | -2.79633 | 0.005957 |
| AZGP1   | -2.74932 | 0.015827 |
| S100A12 | -2.72929 | 0.013601 |
| LCN2    | -2.69741 | 0.00124  |
| CYP2A6  | -2.56574 | 0.049009 |
| ANXA3   | -2.52006 | 0.002581 |
| RHAG    | -2.51196 | 0.000378 |
| JCHAIN  | -2.50766 | 0.049074 |
| TRH     | -2.46723 | 0.000363 |
| SCN4B   | -2.46213 | 0.044511 |
| XKRX    | -2.45027 | 0.000817 |
| HEMGN   | -2.42396 | 0.002437 |
| PADI4   | -2.41951 | 0.019969 |
| TPPP2   | -2.41527 | 0.014849 |

|          |          |          |
|----------|----------|----------|
| ARG1     | -2.39574 | 0.02274  |
| ST8SIA1  | -2.38006 | 0.006242 |
| HBM      | -2.36352 | 0.004886 |
| ACMSD    | -2.32255 | 0.045328 |
| DUSP2    | -2.31716 | 0.013748 |
| AIM1L    | -2.30672 | 0.015408 |
| CYP2S1   | -2.29805 | 0.00139  |
| ST14     | -2.23251 | 0.047873 |
| FAM196A  | -2.21998 | 0.024251 |
| NSUN7    | -2.2107  | 0.020086 |
| FCGR1A   | -2.1784  | 0.015163 |
| LEP      | -2.16939 | 0.03732  |
| SAMSN1   | -2.13844 | 0.044347 |
| ARHGAP20 | -2.07743 | 0.000523 |
| CTSG     | -2.06658 | 0.004801 |
| ALOX15B  | -2.0516  | 0.047825 |
| IL18RAP  | -2.0506  | 0.041584 |
| HIF3A    | -2.04844 | 0.018844 |
| CST7     | -2.04143 | 0.005081 |
| IGFBP6   | -2.03236 | 0.048458 |
| OLFM4    | -2.01052 | 0.001466 |
