# Supplementary material for: Identification of Differentially Expressed circRNAs, miRNAs, and Genes in Patients Associated with Cartilaginous Endplate Degeneration
Source: Hindawi journal article supplement (doi:10.1155/2021/2545459), 2021-01-01
Supplement: f3 [file 2545459.f3.pdf]

| DECs             | Host genes         |
|------------------|--------------------|
| hsa_circ_0052830 | SDC1               |
| hsa_circ_0034645 | CHAC1              |
| hsa_circ_0054651 | EFEMP1             |
| hsa_circ_0052829 | SDC1               |
| hsa_circ_0083941 | GPR124             |
| hsa_circ_0021747 | PAMR1              |
| hsa_circ_0041793 | C17orf81           |
| hsa_circ_0056886 | FAP                |
| hsa_circ_0020787 | TCONS_00063837_H19 |
| hsa_circ_0052833 | SDC1               |
| hsa_circ_0047460 | FHOD3              |
| hsa_circ_0052828 | SDC1               |
| hsa_circ_0056885 | FAP                |
| hsa_circ_0027699 | KITLG              |
| hsa_circ_0041796 | C17orf81           |
| hsa_circ_0033629 | CRIP1              |
| hsa_circ_0018671 | ADAMTS14           |
| hsa_circ_0037034 | IGF1R              |
| hsa_circ_0052832 | SDC1               |
| hsa_circ_0076855 | DST                |
| hsa_circ_0081167 | COL1A2             |
| hsa_circ_0012841 | ROR1               |
| hsa_circ_0011501 | CSMD2              |
| hsa_circ_0025106 | VWF                |
| hsa_circ_0081065 | COL1A2             |
| hsa_circ_0002803 | KITLG              |
| hsa_circ_0074899 | SLIT3              |
| hsa_circ_0056884 | FAP                |
| hsa_circ_0081056 | COL1A2             |
| hsa_circ_0023830 | ODZ4               |
| hsa_circ_0056883 | FAP                |
| hsa_circ_0020269 | HTRA1              |
| hsa_circ_0079022 | LOC100293534       |
| hsa_circ_0085289 | CTHRC1             |
| hsa_circ_0014111 | TMOD4              |
| hsa_circ_0020274 | HTRA1              |
| hsa_circ_0032359 | SMOC1              |
| hsa_circ_0073236 | VCAN               |
| hsa_circ_0024303 | NCAM1              |
| hsa_circ_0073580 | EPB41L4A           |
| hsa_circ_0078945 | None               |
| hsa_circ_0020271 | HTRA1              |
| hsa_circ_0081091 | COL1A2             |
| hsa_circ_0077682 | LAMA4              |
| hsa_circ_0079560 | STEAP1B            |
| hsa_circ_0024583 | MCAM               |

|                  |                    |
|------------------|--------------------|
| hsa_circ_0047798 | ALPK2              |
| hsa_circ_0032784 | ISM2               |
| hsa_circ_0081108 | COL1A2             |
| hsa_circ_0057461 | COL5A2             |
| hsa_circ_0074821 | EBF1               |
| hsa_circ_0074776 | CYFIP2             |
| hsa_circ_0000082 | ROR1               |
| hsa_circ_0032363 | SMOC1              |
| hsa_circ_0028195 | ANAPC7             |
| hsa_circ_0001234 | L3MBTL2            |
| hsa_circ_0077670 | LAMA4              |
| hsa_circ_0027700 | KITLG              |
| hsa_circ_0074771 | CYFIP2             |
| hsa_circ_0010407 | C1orf151-NBL1      |
| hsa_circ_0020206 | PPAPDC1A           |
| hsa_circ_0031927 | NID2               |
| hsa_circ_0073242 | VCAN               |
| hsa_circ_0002329 | KITLG              |
| hsa_circ_0042445 | TCONS_12_00011537  |
| hsa_circ_0089445 | COL5A1             |
| hsa_circ_0089269 | SETX               |
| hsa_circ_0015069 | PBX1               |
| hsa_circ_0060167 | EPB41L1            |
| hsa_circ_0052834 | SDC1               |
| hsa_circ_0001708 | IKZF1              |
| hsa_circ_0020788 | TCONS_00063837_H19 |
| hsa_circ_0066668 | ABI3BP             |
| hsa_circ_0076614 | TMEM63B            |
| hsa_circ_0041063 | FANCA              |
| hsa_circ_0042061 | NTN1               |
| hsa_circ_0000262 | GRK5               |
| hsa_circ_0043606 | KRT19              |
| hsa_circ_0075839 | GPLD1              |
| hsa_circ_0002456 | DOCK1              |
| hsa_circ_0062226 | CLTCL1             |
| hsa_circ_0045418 | PITPNC1            |
| hsa_circ_0015383 | PAPPA2             |
| hsa_circ_0027510 | LYZ                |
| hsa_circ_0025135 | SCNN1A             |
| hsa_circ_0070174 | FRAS1              |
| hsa_circ_0088733 | LCN2               |
| hsa_circ_0082796 | MGAM               |
| hsa_circ_0027511 | LYZ                |
| hsa_circ_0036498 | CTSH               |
| hsa_circ_0029409 | GLT1D1             |
| hsa_circ_0073629 | KCNN2              |
| hsa_circ_0091734 | ZNF185             |

|                  |          |
|------------------|----------|
| hsa_circ_0022340 | SYT7     |
| hsa_circ_0079215 | SDK1     |
| hsa_circ_0088731 | LCN2     |
| hsa_circ_0090316 | MAOA     |
| hsa_circ_0020467 | DOCK1    |
| hsa_circ_0090317 | MAOA     |
| hsa_circ_0090318 | MAOA     |
| hsa_circ_0014221 | S100A9   |
| hsa_circ_0045516 | ABCA6    |
| hsa_circ_0031282 | SLC7A8   |
| hsa_circ_0050872 | MAP4K1   |
| hsa_circ_0014220 | S100A9   |
| hsa_circ_0014222 | S100A8   |
| hsa_circ_0090314 | MAOA     |
| hsa_circ_0070186 | ANXA3    |
| hsa_circ_0090320 | MAOA     |
| hsa_circ_0015856 | C1orf106 |
| hsa_circ_0022102 | PTPRJ    |
| hsa_circ_0090319 | MAOA     |
| hsa_circ_0069094 | S100P    |
| hsa_circ_0070187 | ANXA3    |
| hsa_circ_0081375 | AZGP1    |
| hsa_circ_0090321 | MAOA     |
| hsa_circ_0088732 | LCN2     |
| hsa_circ_0003808 | GFPT1    |
| hsa_circ_0090315 | MAOA     |
| hsa_circ_0075949 | None     |
| hsa_circ_0000577 | None     |
| hsa_circ_0000576 | None     |
| hsa_circ_0029995 | DCLK1    |
| hsa_circ_0024595 | THY1     |
